# Supplementary material for: Inverted vortex fluidic exfoliation and scrolling of hexagonal-boron nitride
Source: Royal Society of Chemistry journal article supplement (doi:10.1039/c9ra03970h), 2019-01-01
Supplement: c9ra03970h1.pdf [file c9ra03970h1.pdf]

### Supplementary Information

## Inverted vortex fluidic exfoliation and scrolling of hexagonal-boron nitride

Ahmed Hussein Mohammed Al-antaki<sup>a,b</sup>, Xuan Luo<sup>a</sup>, Thaar M.D. Alharbi<sup>a</sup>, David P. Harvey<sup>a</sup>, Scott Pye<sup>a</sup>, Jin Zou<sup>c</sup>, Warren Lawrence<sup>d</sup> and Colin L. Raston<sup>a\*</sup>

<sup>a</sup> Flinders Institute for Nanoscale Science and Technology (CNST), College of Science and Engineering, Flinders University, Adelaide, SA 5042, Australia.

<sup>b</sup> Department of Chemistry, Faculty of Sciences, Kufa University, Kufa, Najaf, Iraq.

<sup>c</sup> Materials Engineering, and Centre for Microscopy and Microanalysis, The University of Queensland, Brisbane, QLD 4072, Australia.

<sup>d</sup> College of Science and Engineering, Flinders University, Adelaide, SA 5042, Australia.

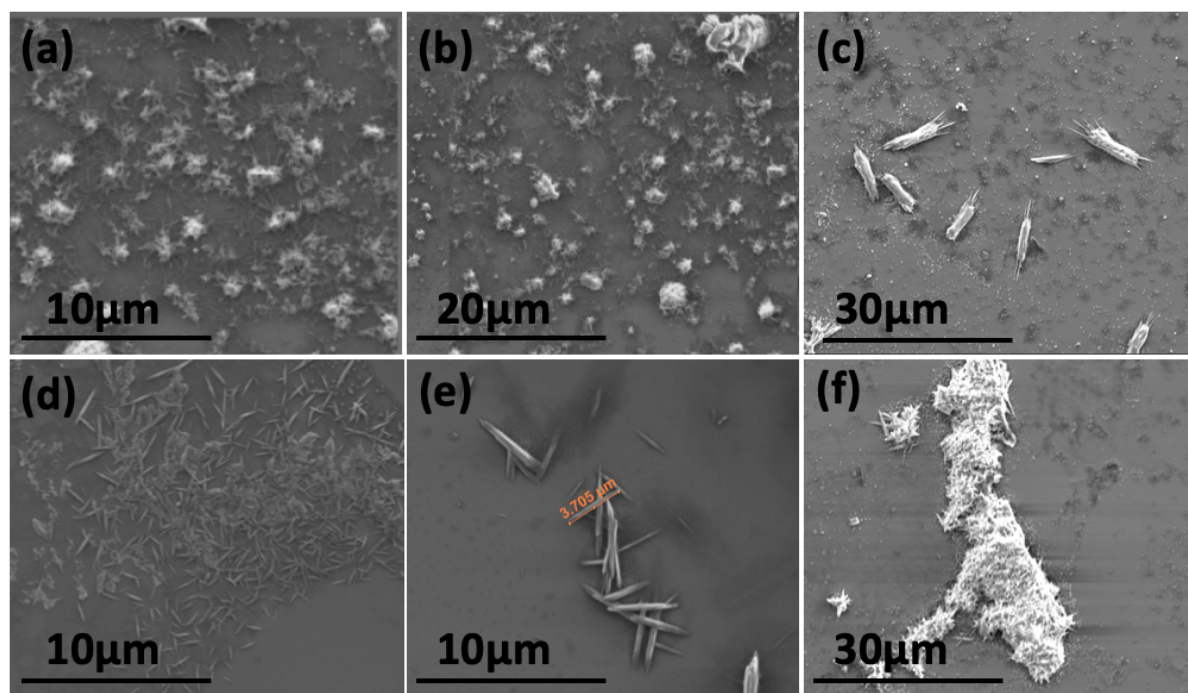

**Fig. S1.** SEM images: (a) As received *h*-BN. (b-f) Drop-cast *h*-BN scrolls on silicon wafer of the supernatant after centrifuging at RCF = 1180 g, post VFD processing at 6k rpm rotational speed, tilt angle -45°, flow rate 0.3 mL/min, and concentration 0.1 mg/mL.

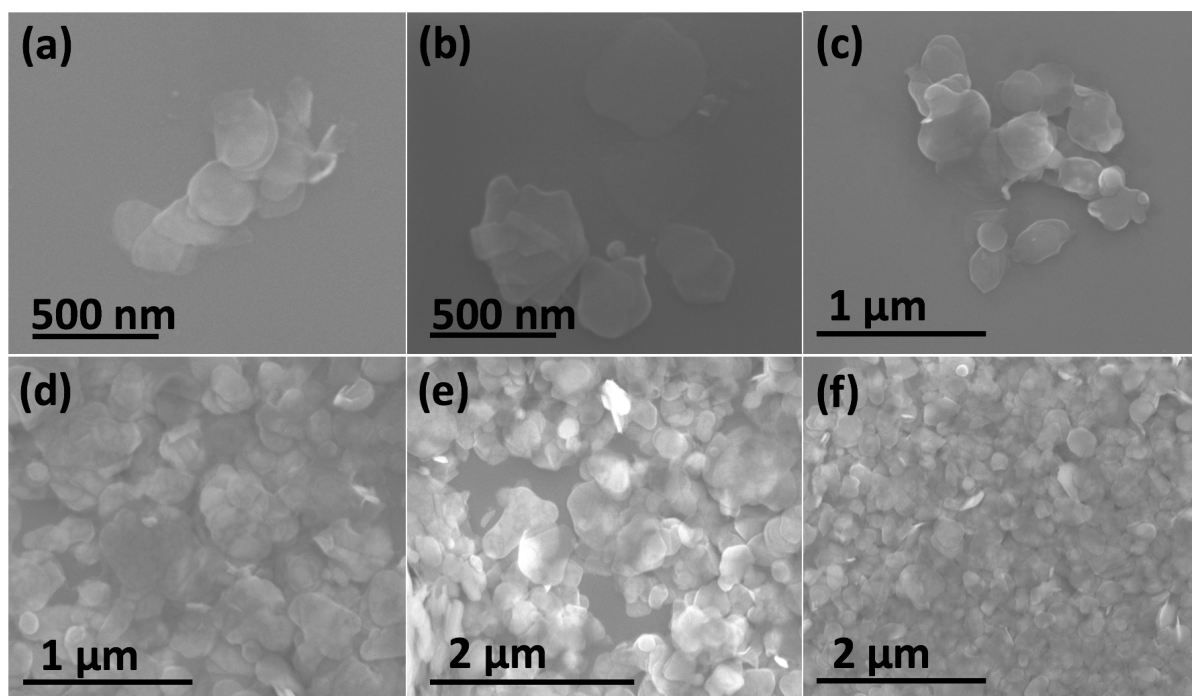

**Fig. S2.** (a-f) SEM images of exfoliated *h*-BN drop cast on silicon wafer using the supernatant after centrifuging at RCF = 1180 g for 3 min, post VFD processing, rotational speed 6k rpm, tilt angle -45°, flow rate 0.75 mL/min, concentration 0.3 mg/mL.

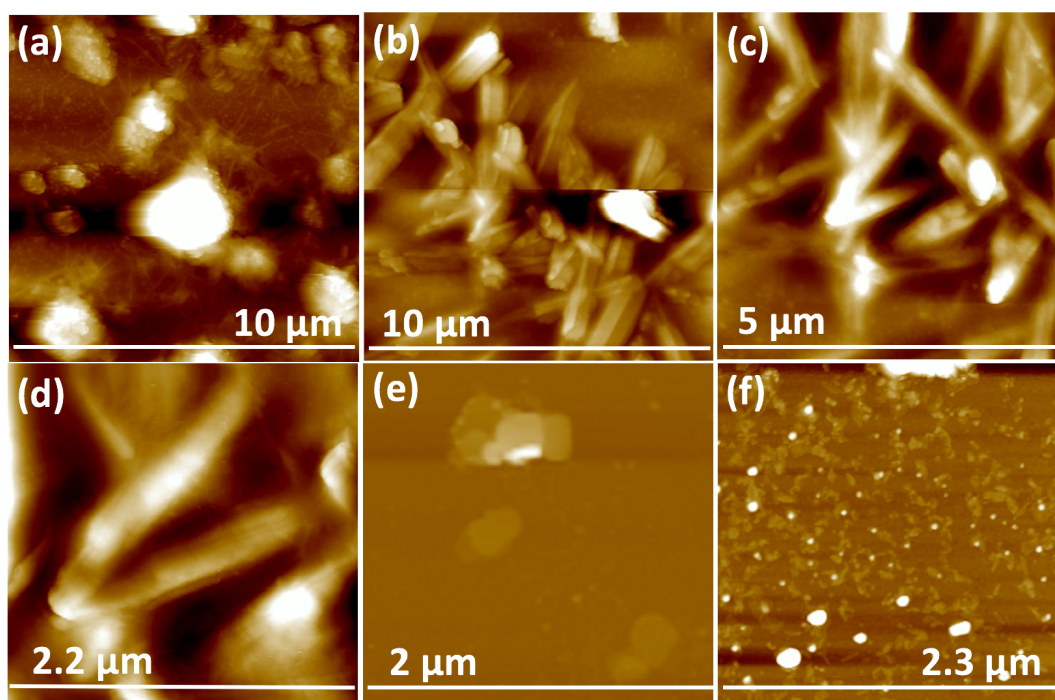

**Fig. S3.** AFM images of drop cast *h*-BN scrolls on silicon wafer using the supernatant after centrifuging at RCF = 1180 g, post VFD processing (rotational speed 6k rpm, tilt angle -45°), (a-d) *h*-BN scrolls prepared using a flow rate of 0.3 mL/min and concentration 0.1 mg/mL. (e-f) Exfoliated *h*-BN prepared using a flow rate of 0.75 mL/min, concentration 0.3 mg/mL.



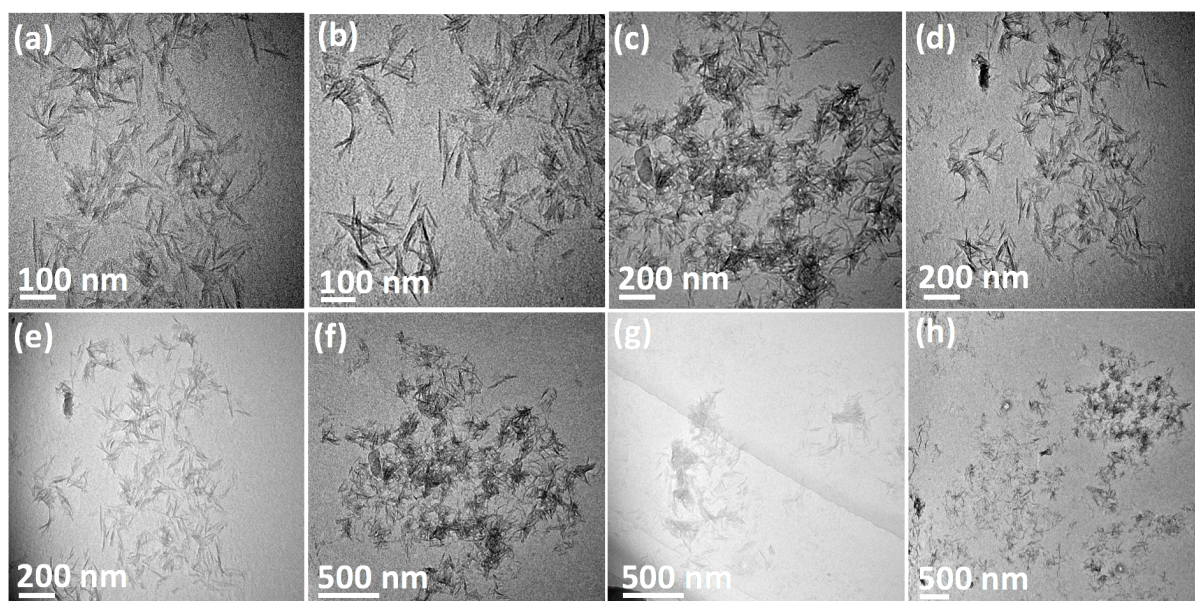

**Fig. S4.** TEM images of drop cast *h*-BN scrolls on a grid, post VFD processing at 6k rpm rotational speed, tilt angle  $-45^\circ$ , flow rate 0.3 mL/min and concentration 0.1 mg/mL.

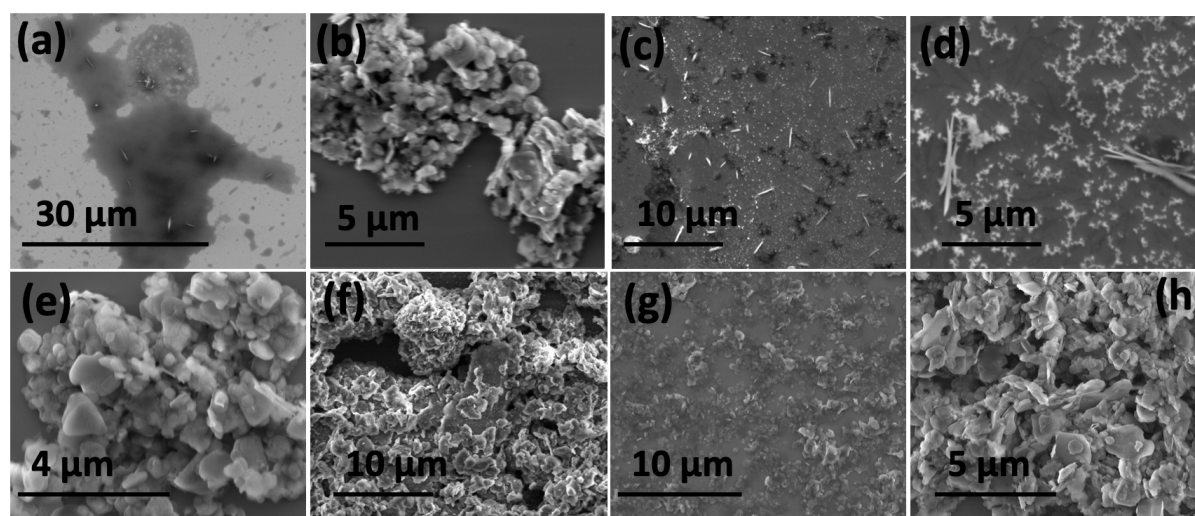

**Fig. S5** SEM images for *h*-BN in water, post VFD processing at a concentration of 0.1 mg/mL, rotational speed 6k rpm and flow rate of the *h*-BN in water at 0.3 mL/min, for different tilt angles. (a, b)  $+45^\circ$ . (c, d)  $+20^\circ$ . (e, f)  $0^\circ$ . (g, h)  $-20^\circ$ .

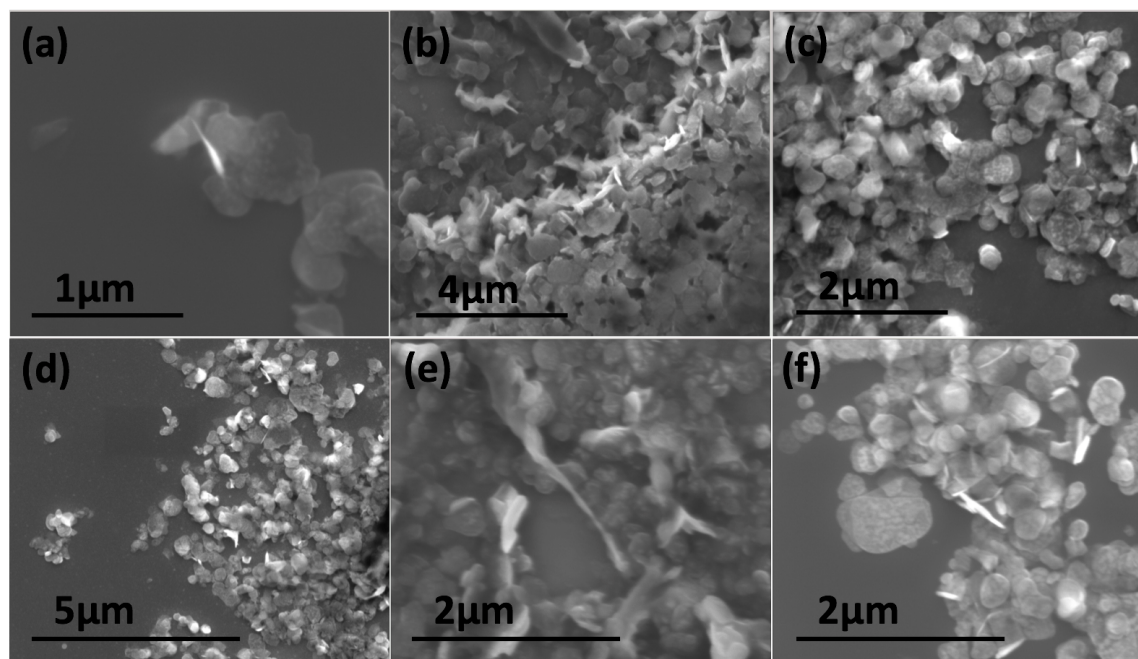

**Fig. S6.** The exfoliation product of *h*-BN after VFD processing to form scrolls, with the initial concentration 0.1 mg/mL, tilt angle  $+45^\circ$  using the confined mode for different rotational speeds. (a-b) 2k rpm for 30 min. (c-d) 3.5k rpm for 10 min. (e-f) 5.5 rpm for 10 min.



**Table S1.** VFD optimisation experiments. Operating parameters of the VFD were varied based on the mode of reaction, rotational speed of the tube, tilt angle, flow rate of the reactants, single solvent systems and mixed solvent systems.

|     | <b>Solvent</b>            | <b>Mode</b> | <b>Speed</b>              | <b>Concentration</b> | <b>Angel</b> | <b>Flow rate</b>                 | <b>Other</b>            | <b>Formation of scrolls or exfoliation</b> |
|-----|---------------------------|-------------|---------------------------|----------------------|--------------|----------------------------------|-------------------------|--------------------------------------------|
| 1.  | NMP only                  | confined    | 4k, 5k, 6k, 7k and 8k rpm | 0.1 mg/mL            | +45°         | N/A                              | 5, 10, 30 min and 1 h   | No                                         |
| 2.  | NMP+ water (1:1)          | confined    | 4k, 5k, 6k, 7k and 8k rpm | 0.1 mg/mL            | +45°         | N/A                              | 10 and 30 min           | No                                         |
| 3.  | NMP+ water (1:1)          | continuous  | 4k, 5k, 6k, 7k and 8k rpm | 0.1 mg/mL            | +45°         | 0.1, 0.3, 0.5, 0.75 and 1 mL/min |                         | No                                         |
| 4.  | NMP+ water (1:1)          | continuous  | 7500rpm                   | 0.1 mg/mL            | +20°         | 0.1, 0.3, 0.5, 0.75 and 1 mL/min |                         | No                                         |
| 5.  | Isopropanol               | confined    | 4k, 5k, 6k, 7k and 8k rpm | 0.1 mg/mL            | +45°         | N/A                              | 5, 10, 30 min and 1 h   | No                                         |
| 6.  | Isopropanol + water (1:1) | confined    | 4k, 5k, 6k, 7k and 8k rpm | 0.1 mg/mL            | +45°         | N/A                              | 5, 10, 30 min and 1 h   | No                                         |
| 7.  | Isopropanol + water (1:1) | continuous  | 4k, 5k, 6k, 7k and 8k rpm | 0.1 mg/mL            | +45°         | 0.1, 0.3, 0.5, 0.75 and 1 mL/min |                         | No                                         |
| 8.  | Isopropanol + water (1:1) | continuous  | 4k, 5k, 6k, 7k and 8k rpm | 0.1 mg/mL            | -20°         | 0.1, 0.3, 0.5, 0.75 and 1 mL/min |                         | No                                         |
| 9.  | Isopropanol + water (1:1) | continuous  | 4k, 5k, 6k, 7k and 8k rpm | 0.1 mg/mL            | -45°         | 0.1, 0.3, 0.5, 0.75 and 1 mL/min | Laser 260 mJ and 600 mJ | No                                         |
| 10. | Toluene                   | confined    | 4k, 5k, 6k, 7k and 8k rpm | 0.1 mg/mL            | +45°         | N/A                              | 5, 10, 30 min and 1 h   | No                                         |
| 11. | Toluene                   | continuous  | 4k, 5k, 6k, 7k and 8k rpm | 0.1 mg/mL            | +45°         | 0.1, 0.3, 0.5, 0.75 and 1 mL/min |                         | No                                         |
| 12. | Toluene +water (1:1)      | confined    | 4k, 5k, 6k, 7k and 8k rpm | 0.1 mg/mL            | +45°         | N/A                              | 5, 10, 30 min and 1 h   | No                                         |
| 13. | Toluene + water (1:1)     | continuous  | 4k, 5k, 6k, 7k and 8k rpm | 0.1 mg/mL            | +45°         | 0.1, 0.3, 0.5, 0.75 and 1 mL/min |                         | No                                         |
| 14. | Toluene + water (1:1)     | continuous  | 4k, 5k, 6k, 7k and 8k rpm | 0.1 mg/mL            | +20°         | 0.1, 0.3, 0.5, 0.75 and 1 mL/min |                         | No                                         |
| 15. | Toluene + water (1:1)     | continuous  | 4k, 5k, 6k, 7k and 8k rpm | 0.1 mg/mL            | 0 °          | 0.1, 0.3, 0.5, 0.75 and 1 mL/min |                         | No                                         |

|     |                              |                   |                           |                  |             |                                  |                         |                |
|-----|------------------------------|-------------------|---------------------------|------------------|-------------|----------------------------------|-------------------------|----------------|
| 16. | Water                        | confined          | 4k, 5k, 6k, 7k and 8k rpm | 0.1 mg/mL        | +45°        | N/A                              | 5, 10, 30 min and 1 h   | No             |
| 17. | Water                        | confined          | 4k, 5k, 6k, 7k and 8k rpm | 0.1 mg/mL        | +45°        | N/A                              | Laser 260 mJ and 600 mJ | No             |
| 18. | Water with FeCl <sub>3</sub> | confined          | 4k, 5k, 6k, 7k and 8k rpm | 0.1 mg/mL        | +45°        | N/A                              | 30 min                  | No             |
| 19. | Water                        | continuous        | 4k, 5k, 6k, 7k and 8k rpm | 0.1 mg/mL        | +45°        | 0.1, 0.5, 0.75 and 1 mL/min      |                         | No             |
| 20. | Water                        | continuous        | 6k rpm                    | 0.1 mg/mL        | +45°        | 0.3 mL/min                       | Heating unite 70C       | No             |
| 21. | Water                        | continuous        | 7.5k rpm                  | 0.1 mg/mL        | +20°        | 0.3 mL/min                       | Heating unite 70C       | No             |
| 22. | Water                        | continuous        | 7.5 rpm                   | 0.1 mg/mL        | +45°        | 0.3 mL/min                       | Laser 260mJ and 600 mJ  | No             |
| 23. | Water                        | confined          | 4k, 5k, 6k, 7k and 8k rpm | 0.1 mg/mL        | +20°        | N/A                              | 5, 10, 30 min and 1 h   | No             |
| 24. | Water                        | continuous        | 4k, 5k, 6k, 7k and 8k rpm | 0.1 mg/mL        | 0°          | 0.1, 0.3, 0.5, 0.75 and 1 mL/min |                         | No             |
| 25. | Water                        | continuous        | 4k, 5k, 6k, 7k and 8k rpm | 0.2 mg/mL        | 0°          | 0.1, 0.3, 0.5, 0.75 and 1 mL/min |                         | No             |
| 26. | Water                        | continuous        | 4k, 5k, 6k, 7k and 8k rpm | 0.1 mg/mL        | -20°        | 0.1, 0.3, 0.5, 0.75 and 1 mL/min |                         | No             |
| 27. | Water                        | continuous        | 4k, 5k, 7k and 8k rpm     | 0.1 mg/mL        | -45°        | 0.1, 0.5, 0.75 and 1 mL/min      |                         | No             |
| 28. | <b>Water</b>                 | <b>continuous</b> | <b>6k rpm</b>             | <b>0.1 mg/mL</b> | <b>-45°</b> | <b>0.3 mL/min</b>                |                         | <b>Scrolls</b> |
| 29. | Water                        | continuous        | 6k rpm                    | 0.1 mg/mL        | -45°        | 0.3 mL/min                       | Recycle twice           | No             |
| 30. | Water                        | continuous        | 6k rpm                    | 1 mg/mL          | -45°        | 0.3 mL/min                       | Recycle twice           | No             |
| 31. | Water                        | continuous        | 6k rpm                    | 1 mg/mL          | -45°        | 0.3 mL/min                       | Recycle three times     | No             |
| 32. | Water                        | continuous        | 7.5k rpm                  | 0.1 mg/mL        | +45°        | 0.1, 0.3, 0.5, 0.75 and 1 mL/min | 10 mm of VFD tube       | No             |
| 33. | Water                        | continuous        | 7.5k rpm                  | 0.1 mg/mL        | +20°        | 0.1, 0.3, 0.5, 0.75 and 1 mL/min | 10 mm of VFD tube       | No             |
| 34. | Water                        | continuous        | 7.5k rpm                  | 0.1 mg/mL        | 0°          | 0.1, 0.3, 0.5, 0.75 and 1 mL/min | 10 mm of VFD tube       | No             |
| 35. | Water 1 M of HCl             | continuous        | 6k rpm                    | 0.1 mg/mL        | -45°        | 0.3 mL/min                       |                         | No             |

|     |                   |                   |                           |                  |             |                             |  |                    |
|-----|-------------------|-------------------|---------------------------|------------------|-------------|-----------------------------|--|--------------------|
| 36. | Water 1 M of NaOH | continuous        | 6k rpm                    | 0.1 mg/mL        | -45°        | 0.3 mL/min                  |  | No                 |
| 37. | Water             | continuous        | 4k, 5k, 7k and 8k rpm     | 0.3 mg/mL        | -45°        | 0.3, 0.5 and 1 mL/min       |  | No                 |
| 38. | <b>Water</b>      | <b>continuous</b> | <b>6k rpm</b>             | <b>0.3 mg/mL</b> | <b>-45°</b> | <b>0.75 mL/min</b>          |  | <b>Exfoliation</b> |
| 39. | Water             | continuous        | 4k, 5k, 6k, 7k and 8k rpm | 0.5 mg/mL        | -45°        | 0.3, 0.5, 0.75 and 1 mL/min |  | No                 |
| 40. | Water             | continuous        | 4k, 5k, 6k, 7k and 8k rpm | 0.7 mg/mL        | -45°        | 0.3, 0.5, 0.75 and 1 mL/min |  | No                 |
| 41. | Water             | continuous        | 4k, 5k, 6k, 7k and 8k rpm | 1 mg/mL          | -45°        | 0.3, 0.5, 0.75 and 1 mL/min |  | No                 |
